# Supplementary material for: Structure of the error-prone DNA ligase of African swine fever virus identifies critical active site residues
Source: PubMed Central journal article supplement (PMC6344480; doi:10.1038/s41467-019-08296-w), 2019-01-23
Supplement: 41467_2019_8296_MOESM1_ESM.pdf [file 41467_2019_8296_MOESM1_ESM.pdf]

# Supplementary Information

For

## Structure of the error-prone DNA ligase of African swine fever virus identifies critical active site residues

Yiqing Chen<sup>1</sup>, Hehua Liu<sup>1,2</sup>, Chun Yang<sup>1</sup>, Yanqing Gao<sup>1</sup>, Xiang Yu<sup>1,2</sup>, Xi Chen<sup>1</sup>,  
Ruixue Cui<sup>2</sup>, Lina Zheng<sup>2</sup>, Suhua Li<sup>1</sup>, Xuhang Li<sup>2</sup>, Jinbiao Ma<sup>2</sup>, Zhen Huang<sup>3,4,\*</sup>, Jixi  
Li<sup>1,5\*</sup>, Jianhua Gan<sup>1,\*</sup>

<sup>1</sup>State Key Laboratory of Genetic Engineering, Collaborative Innovation Center of Genetics and Development, Department of Physiology and Biophysics, School of Life Sciences, Fudan University, Shanghai, 200433, China

<sup>2</sup>State Key Laboratory of Genetic Engineering, Collaborative Innovation Center of Genetics and Development, Department of Biochemistry, School of Life Sciences, Fudan University, Shanghai, 200433, China

<sup>3</sup>College of Life Sciences, Sichuan University, Chengdu, 610041, China

<sup>4</sup>Department of Chemistry, Georgia State University, Atlanta, GA 30303, USA

<sup>5</sup>Department of Neurology, Huashan Hospital, Fudan University, Shanghai, 200040, China

**\*Correspondence to:** [ganjhh@fudan.edu.cn](mailto:ganjhh@fudan.edu.cn) or [lijixi@fudan.edu.cn](mailto:lijixi@fudan.edu.cn) or [huang@gsu.edu](mailto:huang@gsu.edu)

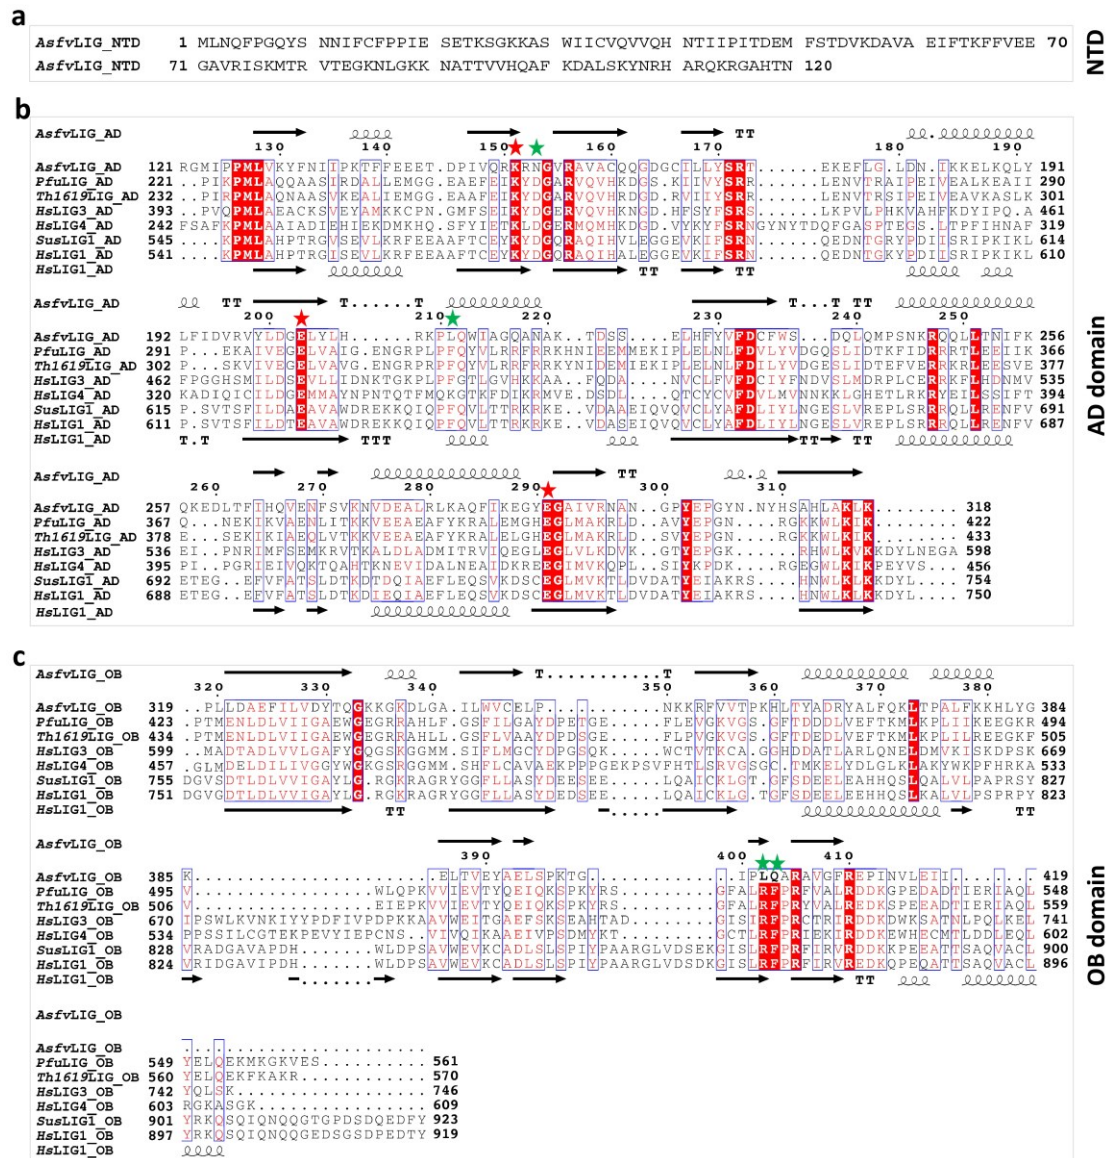

**Supplementary Fig. 1** Sequence of *AsfvLIG* and alignment with homologous proteins. **a** Sequence of *AsfvLIG* NTD domain. **b** Sequence alignment of the AD domains. **c** Sequence alignment of the OB domains. *Asfv*, *African swine fever virus*; *Pfu*, *Pyrococcus furiosus*; *Th1519*, *Thermococcus* sp. 1519; *Sus*, *Sus scrofa*; *Hs*, *Homo sapiens*. The secondary structures of *AsfvLIG* and *HsLIG1* are shown on the top and at bottom, respectively. The catalytic residues and residues in the proximity of the nick of the DNA substrate are indicated by red and green asterisks, respectively.

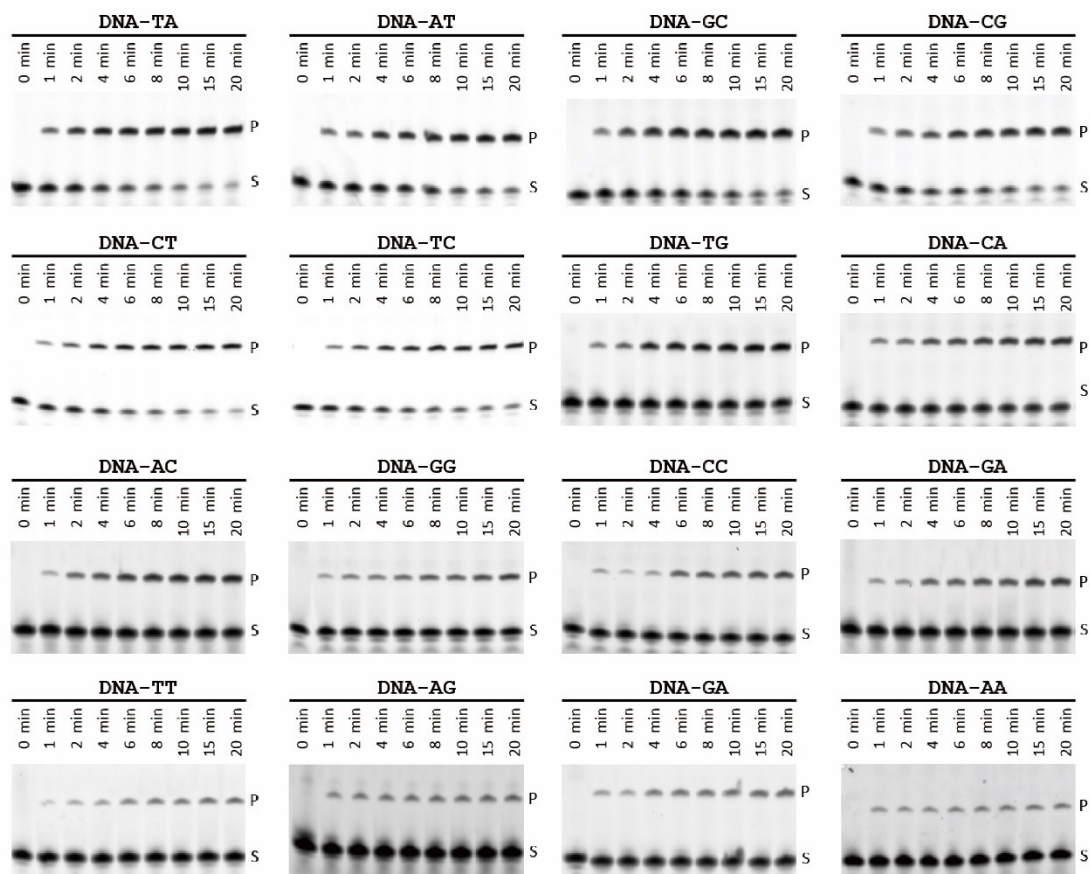

**Supplementary Fig. 2** *In vitro* DNA ligation catalyzed by WT *AsfLIG*. The substrates are named as DNA-XY, where X and Y denote the nucleotides at the template strand and at the 3'-end of the upstream of the nick, respectively. The substrate and product bands are labelled as S and P, respectively.

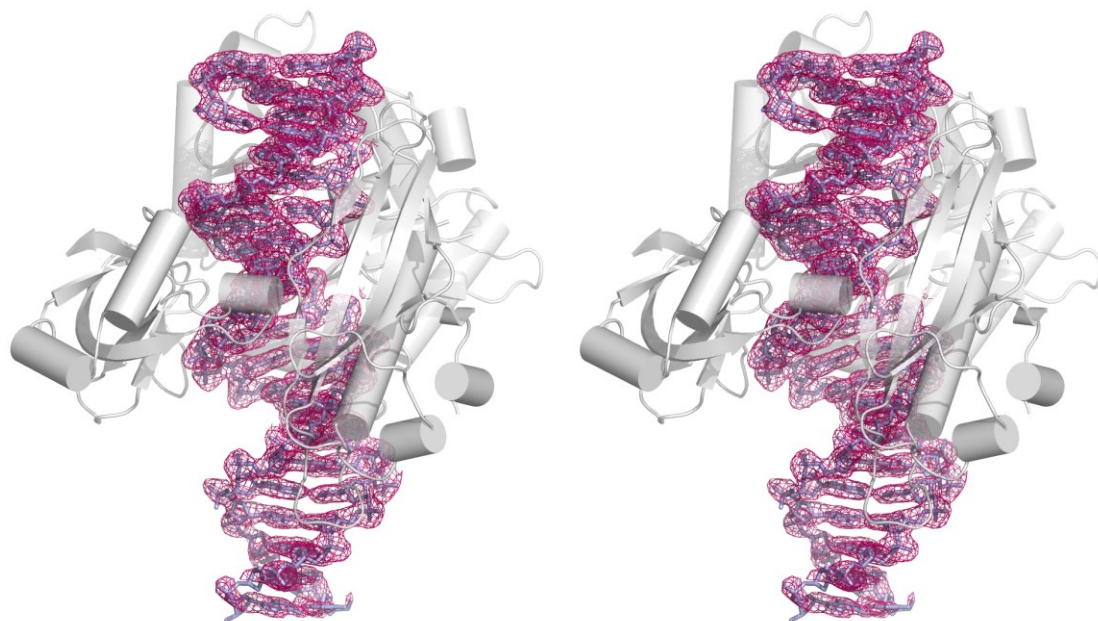

**Supplementary Fig. 3** Stereo-view showing the overall structure of the catalytic form *AsfvLIG:CT1* complex. *AsfvLIG* is shown as cartoon in white. DNAs are shown as sticks in light blue. The  $2F_o-F_c$  electron density maps of the DNAs are colored in magenta and contoured at 1.2 sigma level.

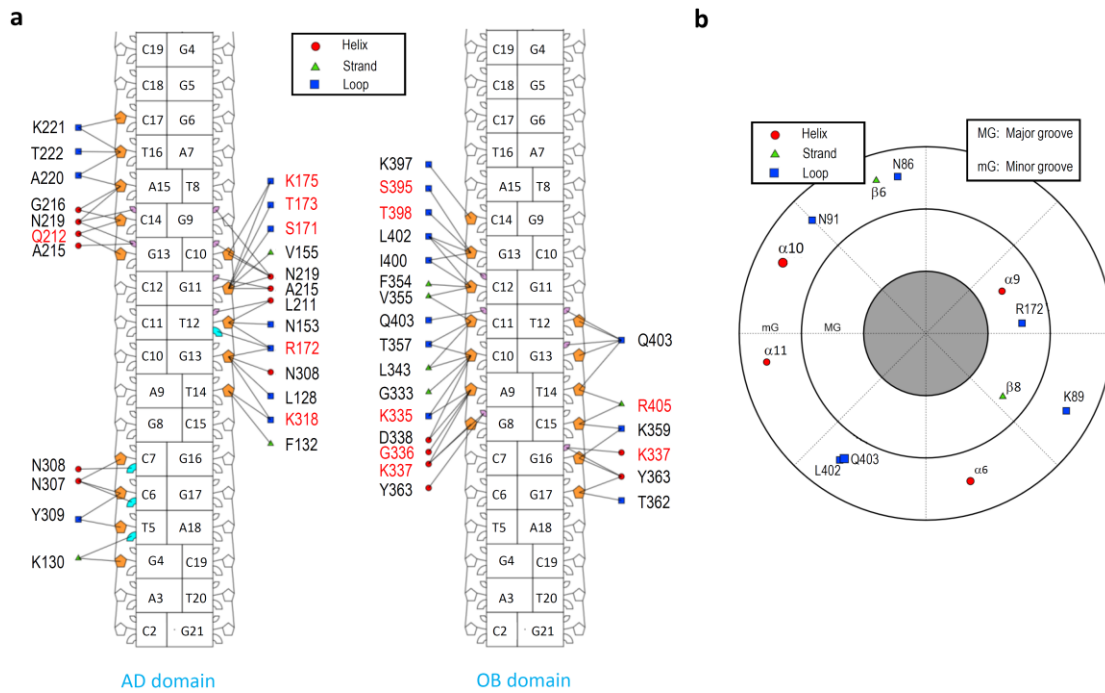

**Supplementary Fig. 4** DNA-protein interactions observed in the catalytic form *AsfvLIG:DNA* complex. **a** Nucleotide-residue contact map showing individual nucleotide-residues interactions for the preferred binding site. Small and large markers on each nucleotide represent the major and minor groove contacts, respectively. Filled-in cyan and pink markers highlight which nucleotides are contacted by at least one residue in the major and minor groove, respectively. Residues that form conserved interaction with DNA in other ligase structures are labelled in red. **b** *Polar contact map* for the catalytic *AsfvLIG:CT1* complex. Helix  $\alpha 9$  and strand  $\beta 8$  bind in DNA major groove (MG, inner circle), whereas strand  $\beta 6$  and helices  $\alpha 6$ ,  $\alpha 10$ , and  $\alpha 11$  all bind in the minor groove (mG, outer circle). Arg172 contacts the major groove, but other loop residues, including Asn86, Lys89, Asn91, Leu402, and Gln403 all contact the DNA from the minor groove side.

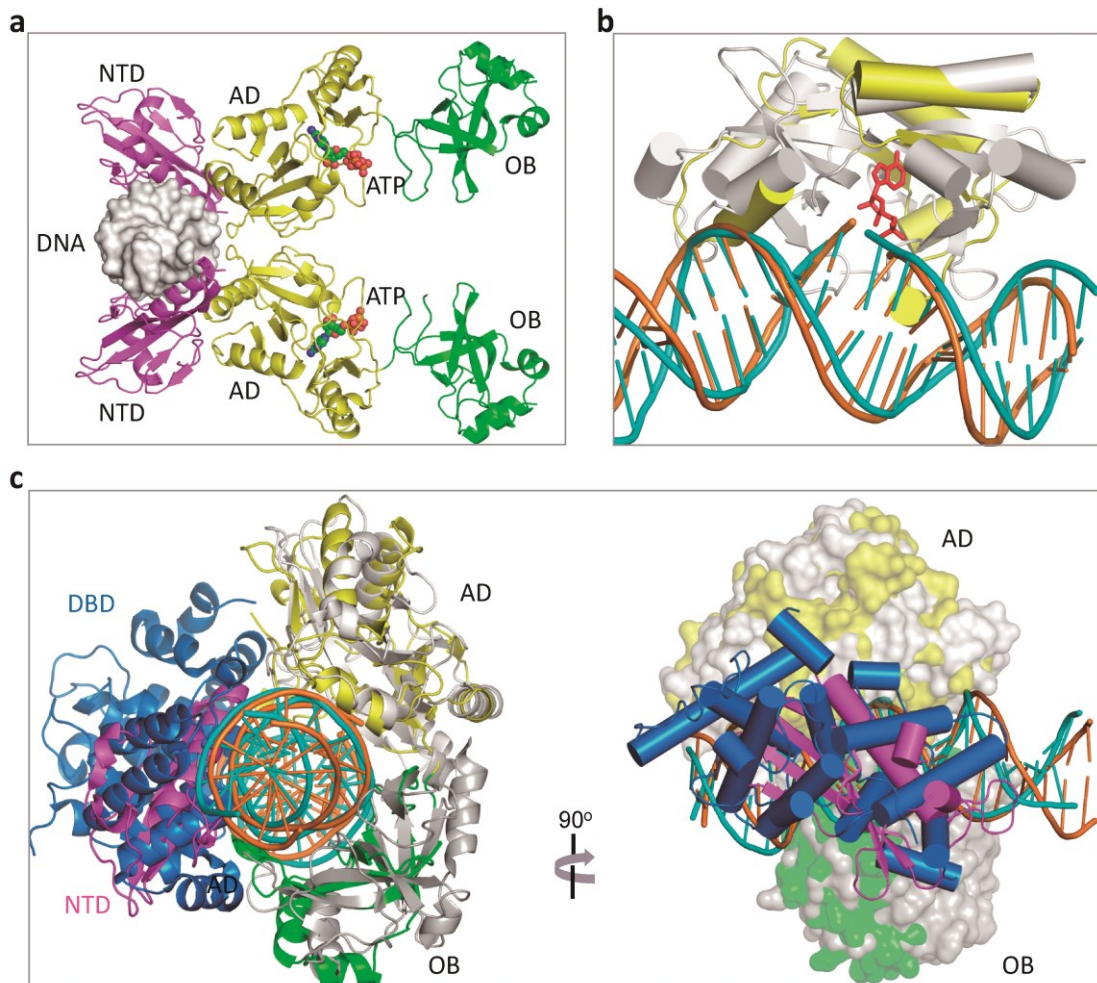

**Supplementary Fig. 5** Comparison of *AsfLIG* and *HsLIG1* structures. **a** The non-catalytic form *AsfLIG* structure showing regular B-form DNA bound by two NTD domains. DNA is shown as surface in white. *AsfLIG* is shown as cartoon with the NTD, AD, and OB domains colored in magenta, yellow, and green, respectively. ATP molecules are shown as spheres. **b** Structural superposition showing the similar nick site DNA bending. For clarity, only the AD domains are shown for the *AsfLIG* (yellow) and *HsLIG1* (white) structures. DNA is shown as an orange cartoon for the *AsfLIG* structure and a cyan cartoon for the *HsLIG1* structure. AMP that pyrophosphate linked to the 5'-P of downstream DNA is shown as red sticks. **c** Structural superposition showing the similar orientations but different folds of the NTD and DBD domains. DNA and the NTD, AD, and OB domains of *AsfLIG* are colored in orange, magenta, yellow, and green, respectively. For the *HsLIG1* structure, DNA, the DBD, AD, and OB domains are colored in cyan, blue, white, and grey, respectively.

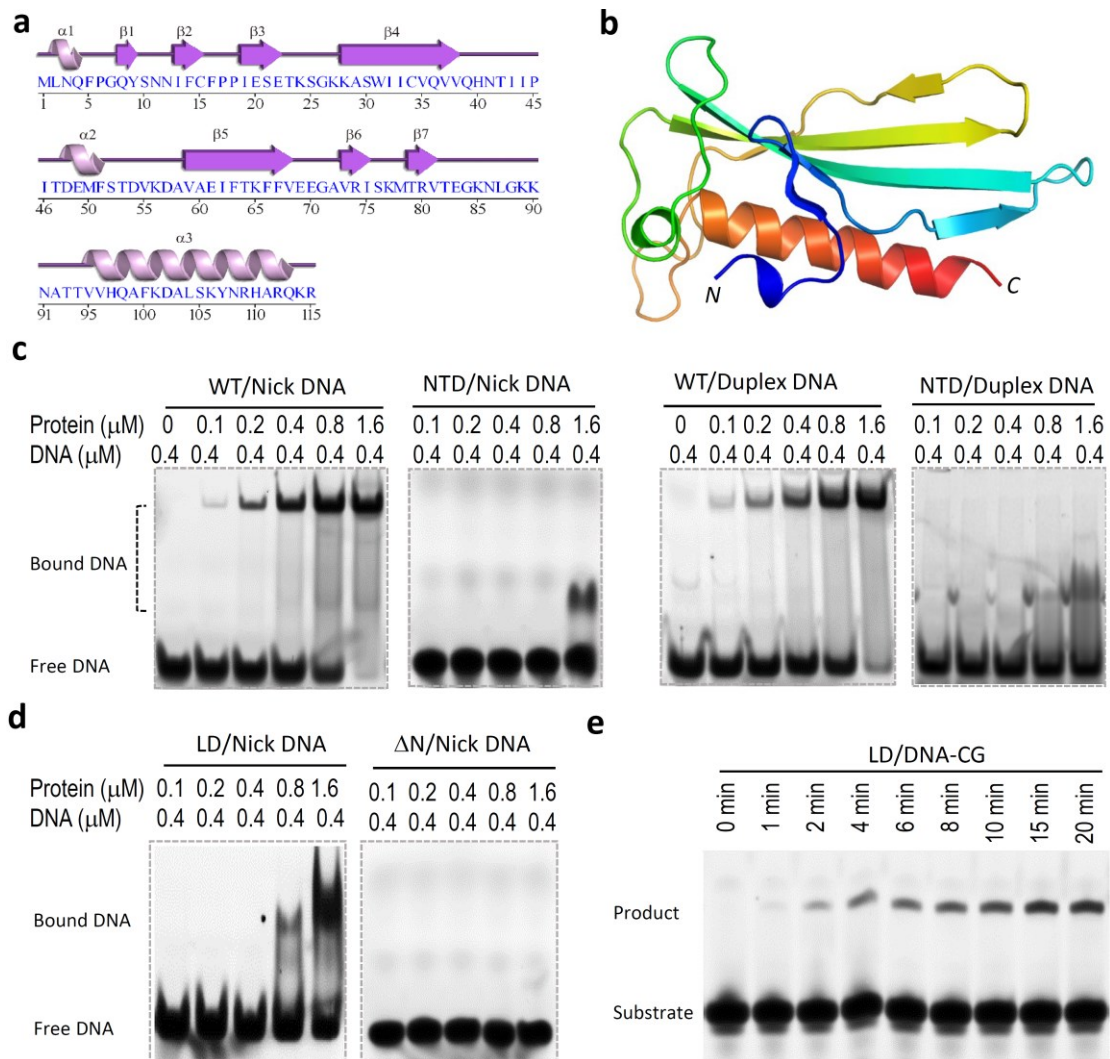

**Supplementary Fig. 6** Structure of *AsfvLIG* NTD domain. **a** Sequence and secondary structure of *AsfvLIG* NTD. **b** Overall structure of *AsfvLIG* NTD. **c** *In vitro* nick and duplex DNA-CG binding by WT *AsfvLIG*, and *AsfvLIG* NTD. **d** *In vitro* nick DNA-CG binding by *AsfvLIG* with NTD residues 85-92 replaced with two Gly residues (for *AsfvLIG* LD) or *AsfvLIG* with NTD deleted (for *AsfvLIG*  $\Delta\text{N}$ ). **e** *In vitro* nick DNA-CG ligation by *AsfvLIG* LD.

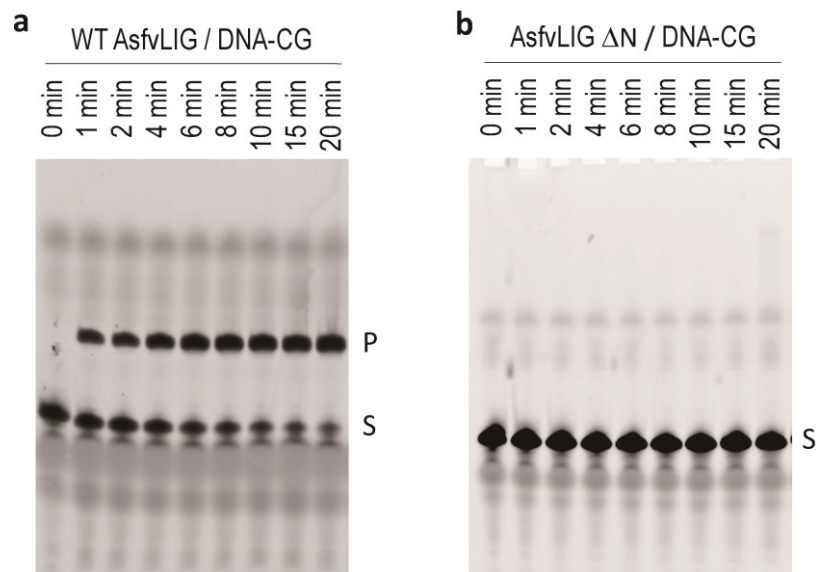

**Supplementary Fig. 7** The uncropped gel images showing *in vitro* nick DNA-CG ligation by **a** WT AsfvLIG and **b** AsfvLIG  $\Delta$ N, respectively. The substrate and product bands are labelled as S and P, respectively.



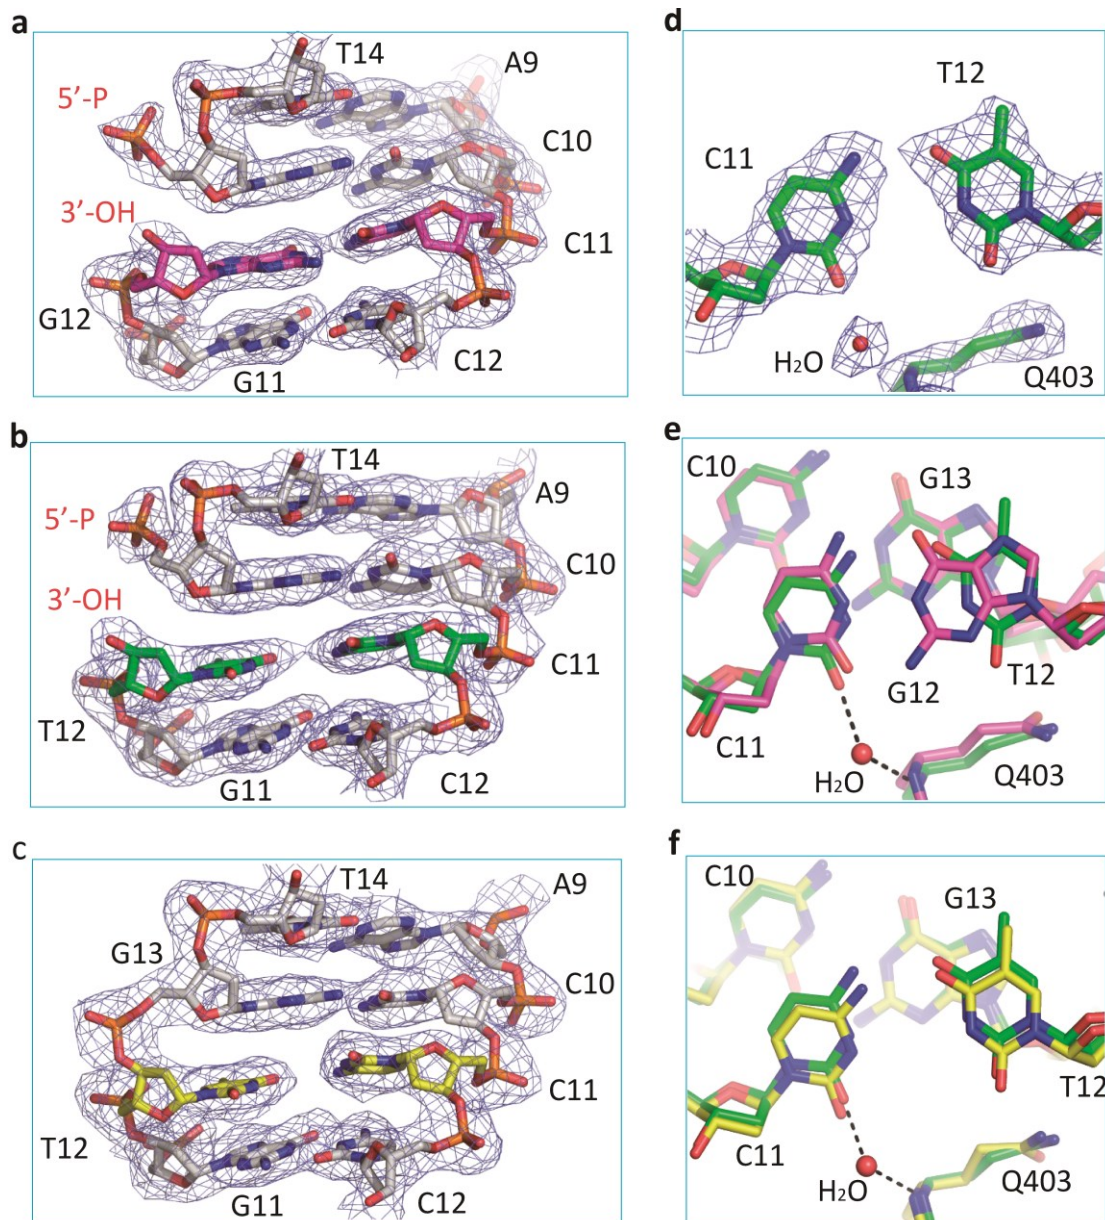

**Supplementary Fig. 8** Conformational comparison of the nick site base pairs. Conformations of the base pairs located at the nick sites and flanking regions of **a** *AsfvLIG:CG*, **b** *AsfvLIG:CT1*, and **c** *AsfvLIG:CT2* structures, respectively. **d** Local conformation of the C:T pair observed in the *AsfvLIG:CT1* structure. **e** Superposition of the C:G and C:T pairs observed in the *AsfvLIG:CG* and *AsfvLIG:CT1* structures, respectively. **f** Comparison of the C:T pairs observed in the *AsfvLIG:CT1* and *AsfvLIG:CT2* structures, respectively. In panels **a-c**, the 2F<sub>o</sub>-F<sub>c</sub> electron density maps are all contoured at the 1.5 sigma level. C-atoms of the nick site C:G, C:T, and C:T base pairs are colored in magenta, green, and yellow for the *AsfvLIG:CG*, *AsfvLIG:CT1* and *AsfvLIG:CT2* structures, respectively.

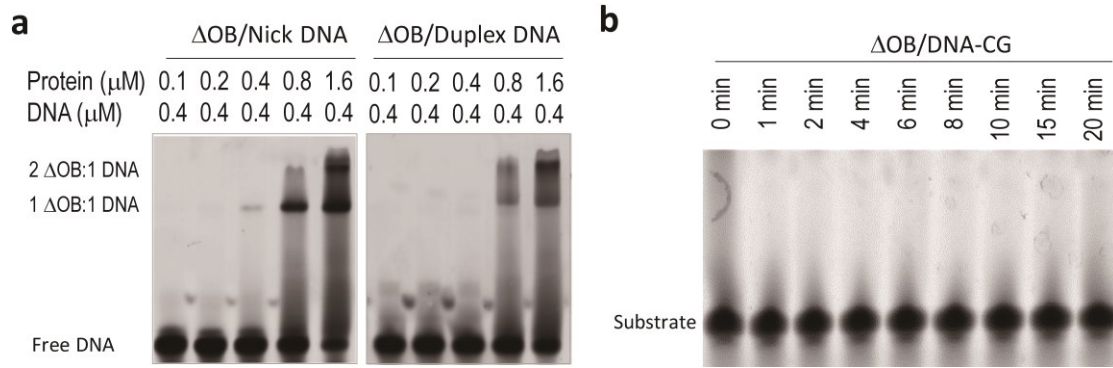

**Supplementary Fig. 9** *In vitro* **a** DNA binding and **b** DNA ligation by AsfvLIG  $\Delta$ OB protein. In the AsfvLIG  $\Delta$ OB protein, the OB domain was deleted.

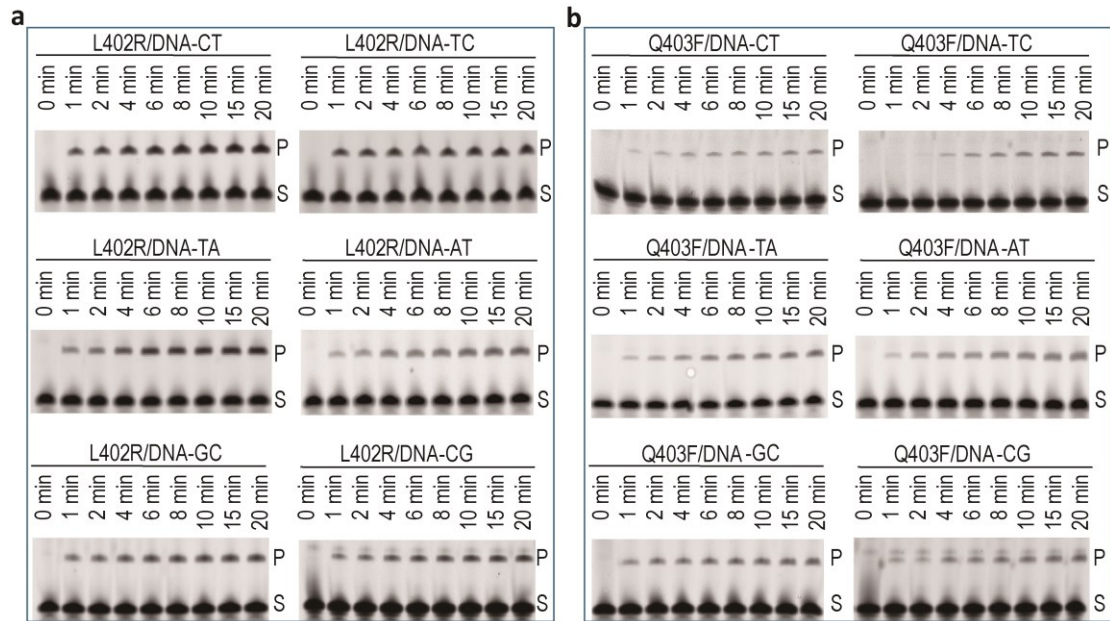

**Supplementary Fig. 10** *In vitro* DNA ligation catalyzed by **a** L402R and **b** Q403F mutants of *AsfVLIg*. The substrate and product bands are labelled as S and P, respectively.

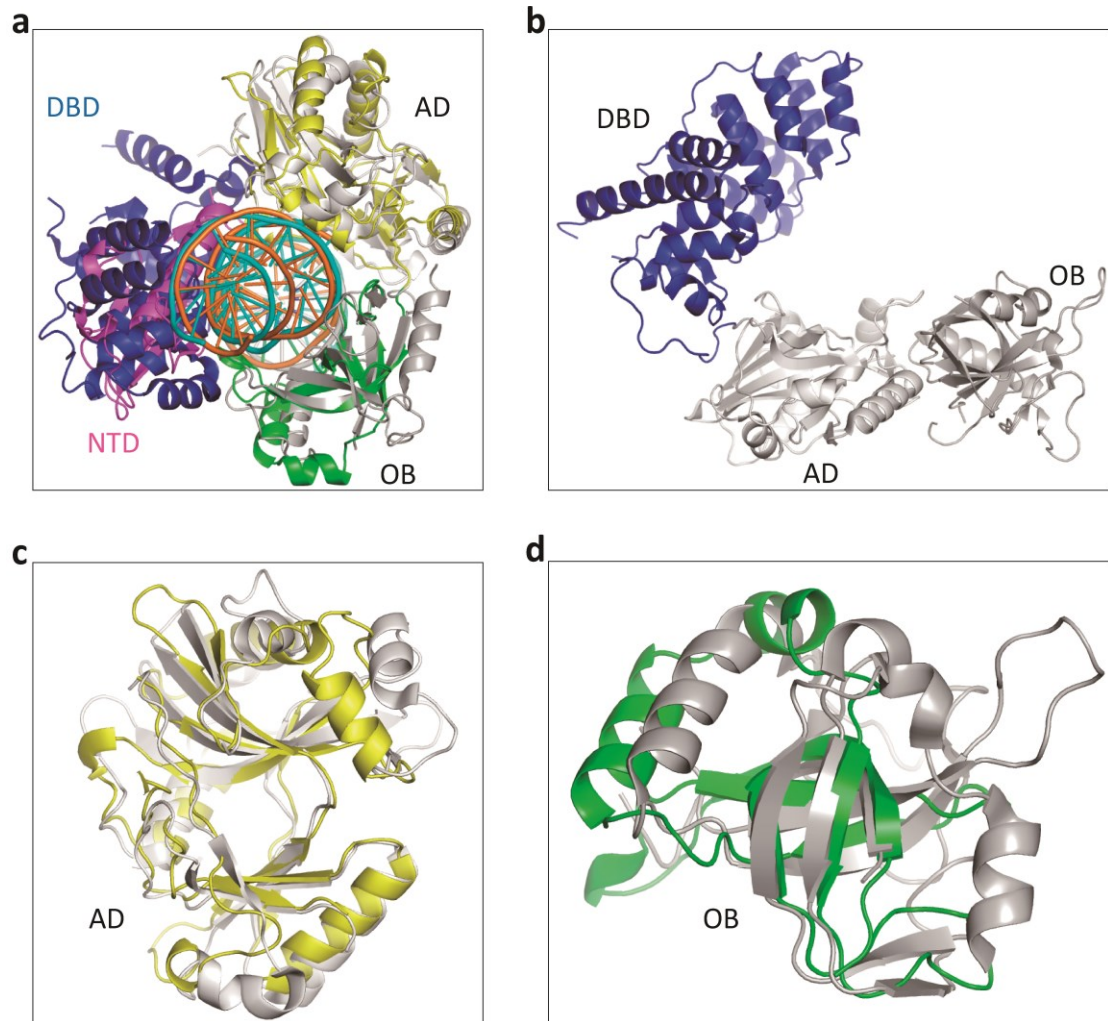

**Supplementary Fig. 11** Comparison of *AsfLIG* with the homologous proteins. **a** Structural superposition between *AsfLIG*:CT1 complex and *HsLIG3*:DNA complex (PDB\_ID: 3L2P). For the *AsfLIG*:CT1 complex, DNA and the NTD, AD, and OB domains are colored in orange, magenta, yellow, and green, respectively. For the *HsLIG3*:DNA complex, DNA, the DBD, AD, and OB domains are colored in cyan, blue, white, and grey, respectively. **b** The open form *HsLIG4* structure (PDB\_ID: 3W5O). **c** Comparison of the AD domains of *AsfLIG* and *HsLIG4*, which are colored in yellow and white, respectively. **d** Comparison of the OB domains of *AsfLIG* and *HsLIG4*, which are colored in green and grey, respectively.

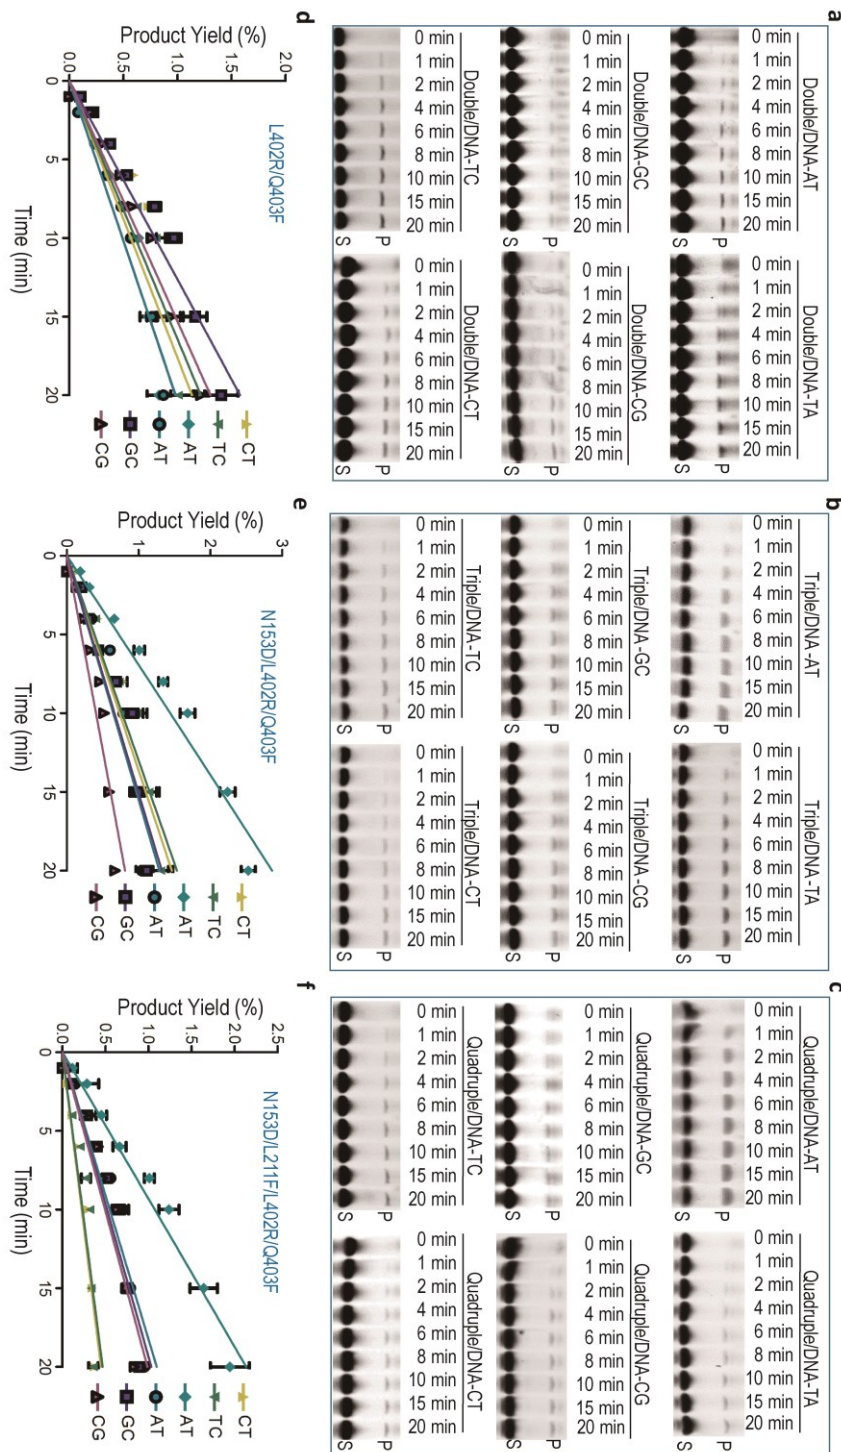

**Supplementary Fig. 12** Gel analysis and quantification of *in vitro* DNA ligation catalyzed by the double mutant (L402R/Q403F, **a** and **d**), the triple mutant (N153D/L402R/Q403F, **b** and **e**), and the quadruple mutant (N153D/L211F/L402R/Q403F, **c** and **f**) of *AsfMLIG*. The substrate and product bands are labelled as S and P, respectively. In panels **d-f**, the data represent the mean of three independent experiments, with standard deviation ( $\pm$ SD) values indicated by error bars.

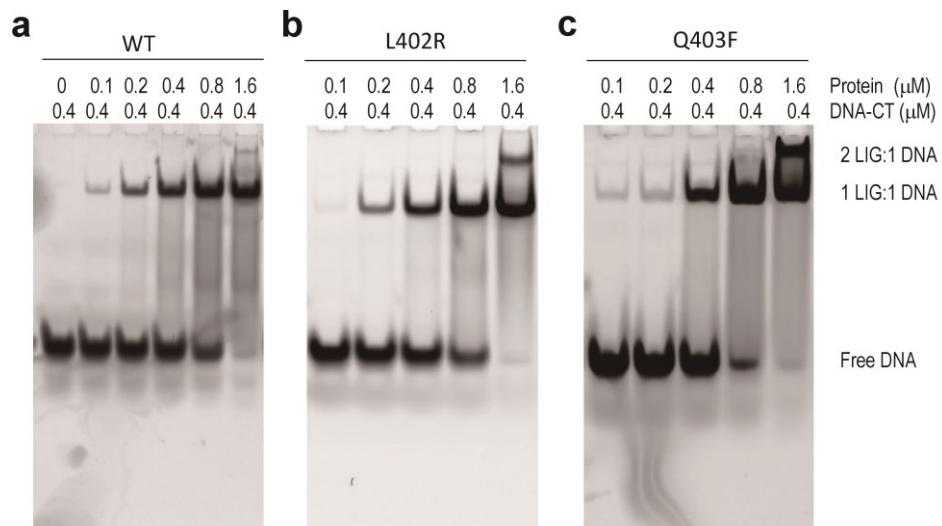

**Supplementary Fig. 13** The uncropped gel images showing *in vitro* nick DNA-CG binding by **a** WT AsfvLIG, **b** L402R mutant, and **c** Q403F mutant, respectively.

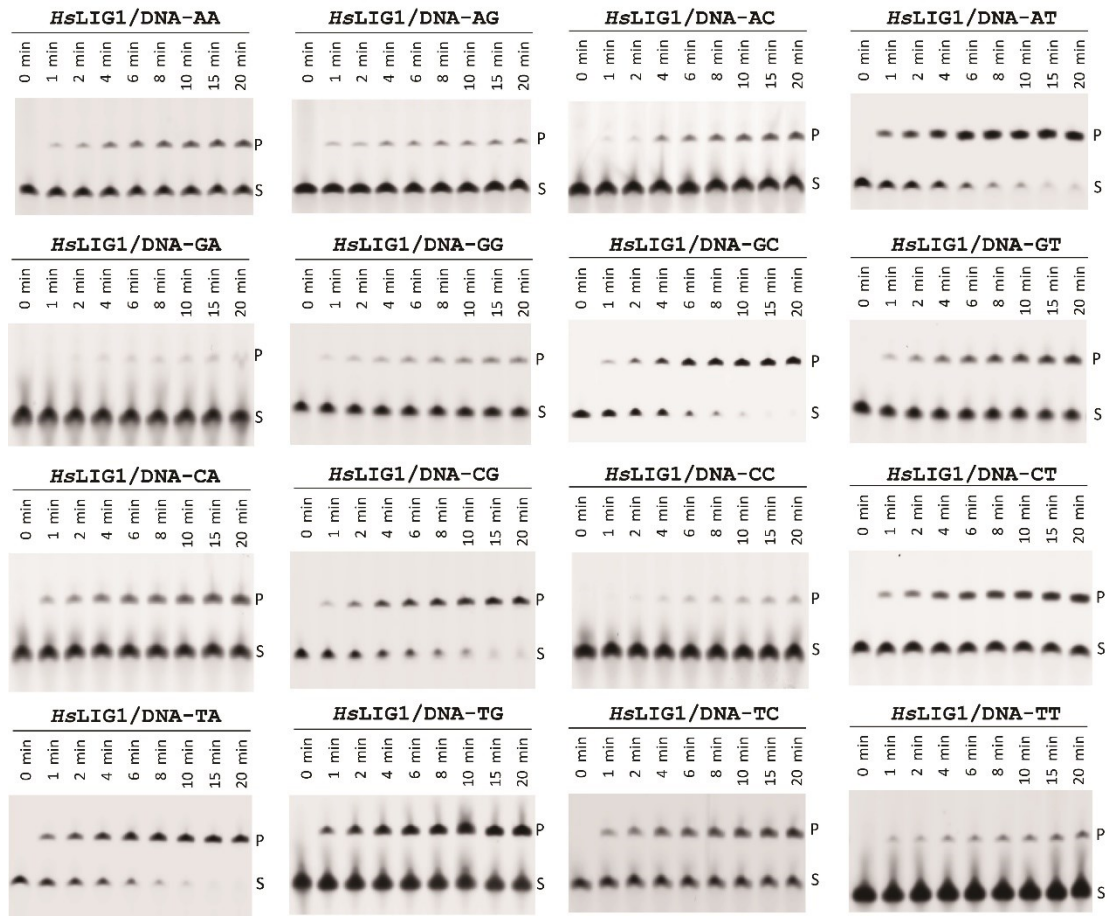

**Supplementary Fig. 14** *In vitro* DNA ligation catalyzed by WT *HsLIG1*. The substrate and product bands are labelled as S and P, respectively.

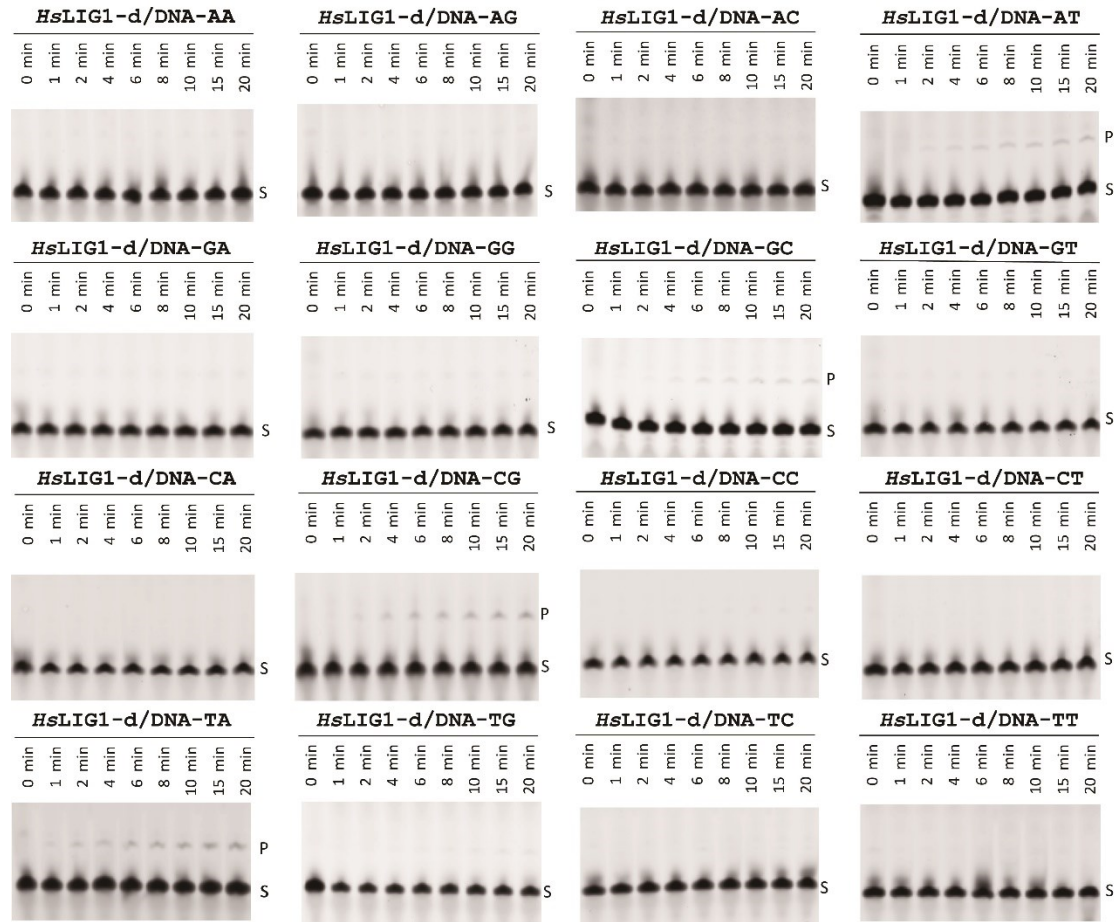

**Supplementary Fig. 15** *In vitro* DNA ligation catalyzed by the HsLIG1 R871L/F872Q double mutant (HsLIG1-d). The substrate and product bands are labelled as S and P, respectively.



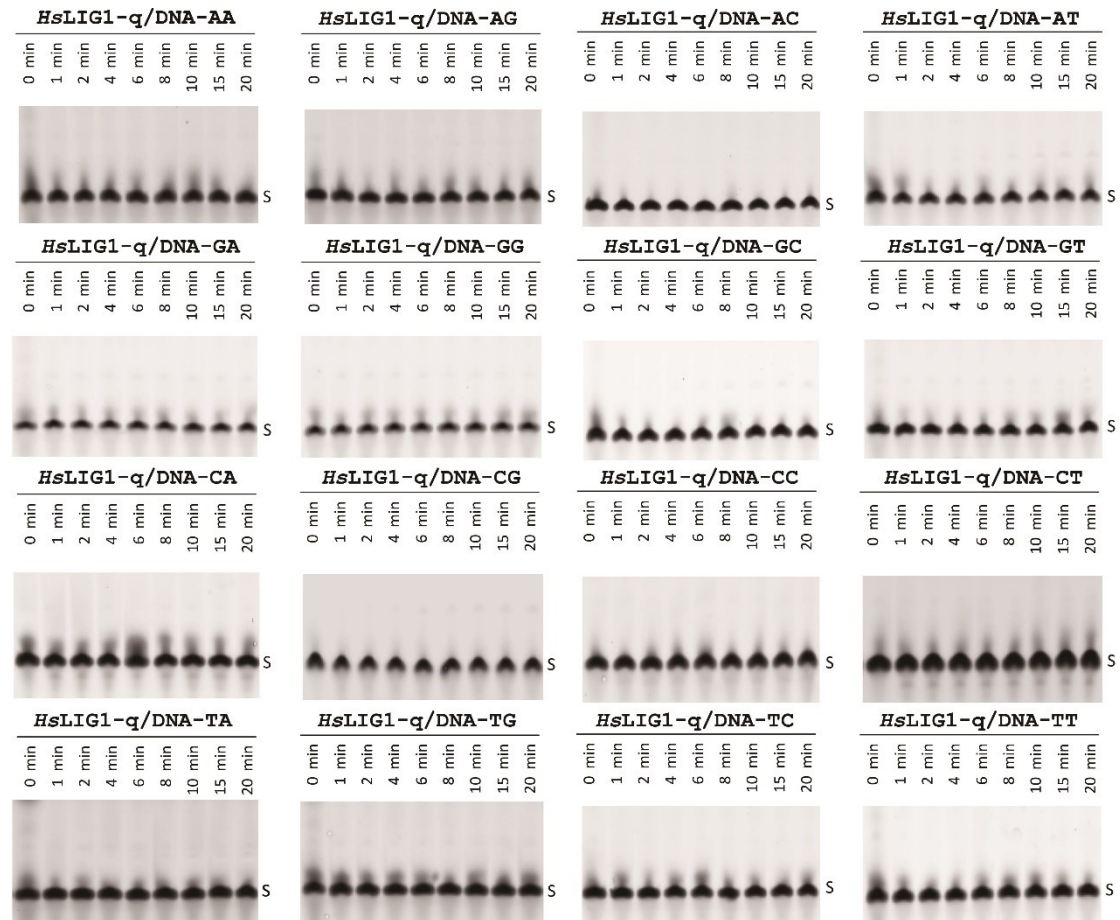

**Supplementary Fig. 16** *In vitro* DNA ligation catalyzed by the *HsLIG1* D570N/F635L/R871L/F872Q quadruple mutant (*HsLIG1-q*). The substrate bands are labelled as S.

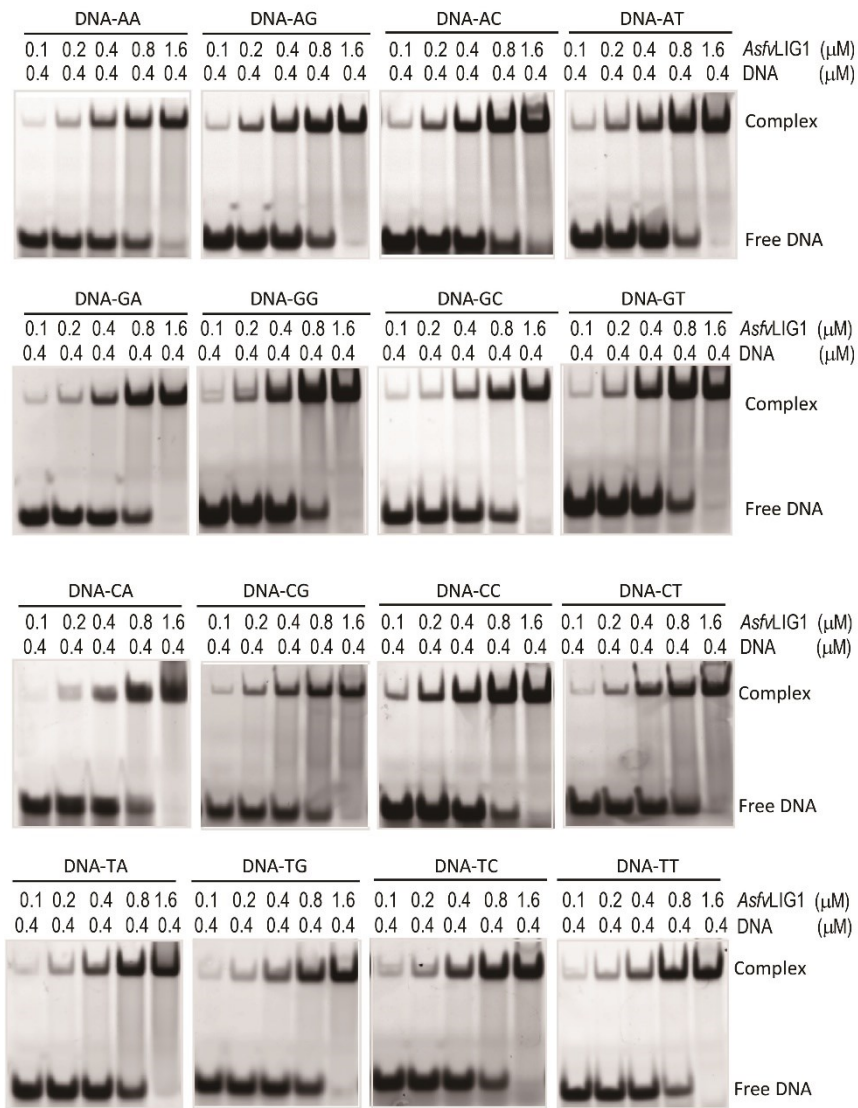

**Supplementary Fig. 17** *In vitro* DNA binding by AsfVLIg1.

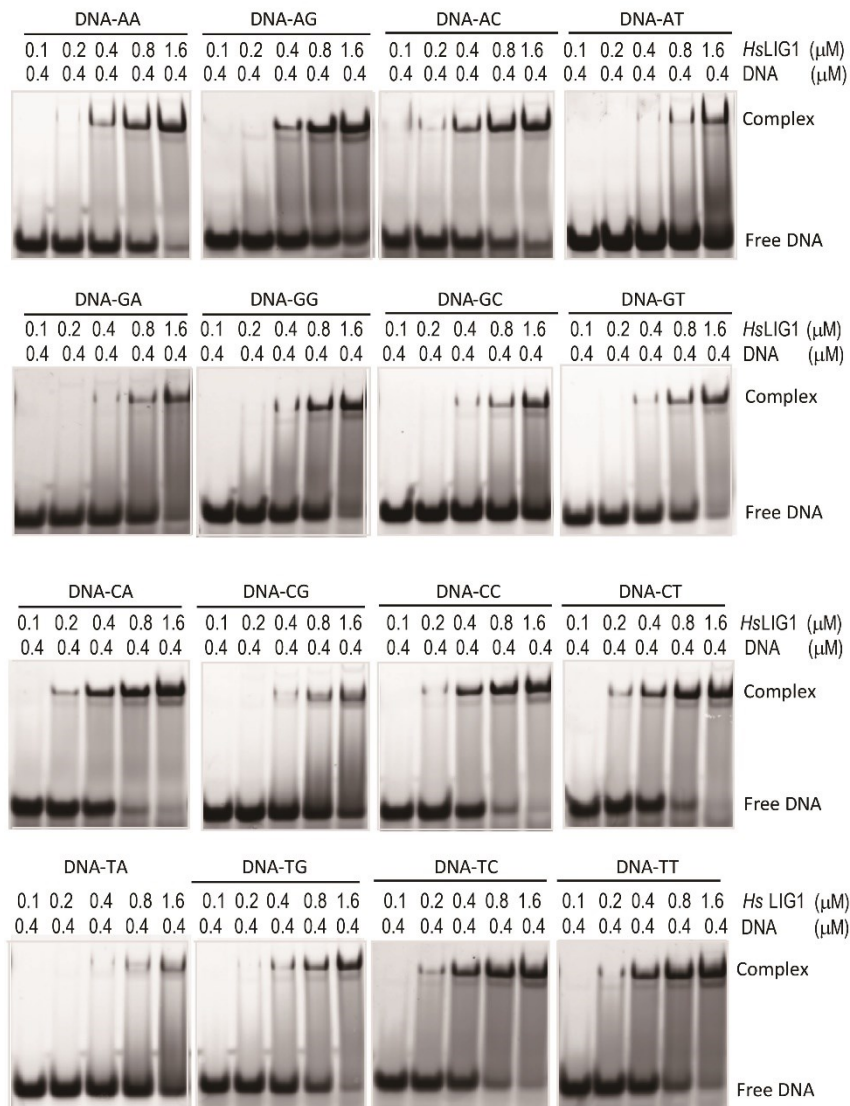

**Supplementary Fig. 18** *In vitro* DNA binding by HsLIG1.

**Supplementary Table 1.** Sequences of DNAs utilized in the *in vitro* binding and catalysis

| Name   | Sequence and structure <sup>a</sup>                                                                    | Name   | Sequence and structure <sup>a</sup>                                                                    |
|--------|--------------------------------------------------------------------------------------------------------|--------|--------------------------------------------------------------------------------------------------------|
| DNA-AT | 5' -CAGTCCGAC <b>A</b> CGCATCCCG-3'<br>   <br>3' -GTCAGGCTG <b>T</b> GCGTAGGGC-FAM-5'<br> <br><b>P</b> | DNA-TA | 5' -CAGTCCGAC <b>T</b> CGCATCCCG-3'<br>   <br>3' -GTCAGGCTG <b>A</b> GCGTAGGGC-FAM-5'<br> <br><b>P</b> |
| DNA-GC | 5' -CAGTCCGAC <b>G</b> CGCATCCCG-3'<br>   <br>3' -GTCAGGCTG <b>C</b> GCGTAGGGC-FAM-5'<br> <br><b>P</b> | DNA-CG | 5' -CAGTCCGAC <b>C</b> CGCATCCCG-3'<br>   <br>3' -GTCAGGCTG <b>G</b> GCGTAGGGC-FAM-5'<br> <br><b>P</b> |
| DNA-AA | 5' -CAGTCCGAC <b>A</b> CGCATCCCG-3'<br>   <br>3' -GTCAGGCTG <b>A</b> GCGTAGGGC-FAM-5'<br> <br><b>P</b> | DNA-GA | 5' -CAGTCCGAC <b>G</b> CGCATCCCG-3'<br>   <br>3' -GTCAGGCTG <b>A</b> GCGTAGGGC-FAM-5'<br> <br><b>P</b> |
| DNA-AG | 5' -CAGTCCGAC <b>A</b> CGCATCCCG-3'<br>   <br>3' -GTCAGGCTG <b>G</b> GCGTAGGGC-FAM-5'<br> <br><b>P</b> | DNA-GG | 5' -CAGTCCGAC <b>G</b> CGCATCCCG-3'<br>   <br>3' -GTCAGGCTG <b>G</b> GCGTAGGGC-FAM-5'<br> <br><b>P</b> |
| DNA-AC | 5' -CAGTCCGAC <b>A</b> CGCATCCCG-3'<br>   <br>3' -GTCAGGCTG <b>C</b> GCGTAGGGC-FAM-5'<br> <br><b>P</b> | DNA-GT | 5' -CAGTCCGAC <b>G</b> CGCATCCCG-3'<br>   <br>3' -GTCAGGCTG <b>T</b> GCGTAGGGC-FAM-5'<br> <br><b>P</b> |
| DNA-TG | 5' -CAGTCCGAC <b>T</b> CGCATCCCG-3'<br>   <br>3' -GTCAGGCTG <b>G</b> GCGTAGGGC-FAM-5'<br> <br><b>P</b> | DNA-CA | 5' -CAGTCCGAC <b>C</b> CGCATCCCG-3'<br>   <br>3' -GTCAGGCTG <b>A</b> GCGTAGGGC-FAM-5'<br> <br><b>P</b> |
| DNA-TT | 5' -CAGTCCGAC <b>T</b> CGCATCCCG-3'<br>   <br>3' -GTCAGGCTG <b>T</b> GCGTAGGGC-FAM-5'<br> <br><b>P</b> | DNA-CC | 5' -CAGTCCGAC <b>C</b> CGCATCCCG-3'<br>   <br>3' -GTCAGGCTG <b>C</b> GCGTAGGGC-FAM-5'<br> <br><b>P</b> |
| DNA-TC | 5' -CAGTCCGAC <b>T</b> CGCATCCCG-3'<br>   <br>3' -GTCAGGCTG <b>C</b> GCGTAGGGC-FAM-5'<br> <br><b>P</b> | DNA-CT | 5' -CAGTCCGAC <b>C</b> CGCATCCCG-3'<br>   <br>3' -GTCAGGCTG <b>T</b> GCGTAGGGC-FAM-5'<br> <br><b>P</b> |

<sup>a</sup>: The continuous template strand is listed at the top of each DNA structure. The broken strand is listed at the bottom; the upstream is FAM-labelled and the downstream contains one phosphate group at their 5'-ends, respectively. The nick site base pairs are highlighted in red in all the DNA structures.

**Supplementary Table 2.** Reaction rate of AsfvLIG catalyzed DNA ligation

| Enzymes    | DNA substrate <sup>a</sup> | $K_{obs}$ ( $\times 10^{-6}$ , min <sup>-1</sup> ) <sup>b</sup> |
|------------|----------------------------|-----------------------------------------------------------------|
| WT AsfvLIG | DNA-TA                     | 224.82±8.26                                                     |
| WT AsfvLIG | DNA-GC                     | 145.42±3.99                                                     |
| WT AsfvLIG | DNA-CG                     | 134.83±3.32                                                     |
| WT AsfvLIG | DNA-AT                     | 127.94±5.33                                                     |
| WT AsfvLIG | DNA-CT                     | 195.11±11.2                                                     |
| WT AsfvLIG | DNA-TC                     | 189.94±7.20                                                     |
| WT AsfvLIG | DNA-TG                     | 42.84±1.93                                                      |
| WT AsfvLIG | DNA-CA                     | 28.69±1.61                                                      |
| WT AsfvLIG | DNA-AC                     | 16.44±0.69                                                      |
| WT AsfvLIG | DNA-GG                     | 9.67±0.11                                                       |
| WT AsfvLIG | DNA-CC                     | 10.38±0.66                                                      |
| WT AsfvLIG | DNA-GT                     | 6.83±0.21                                                       |
| WT AsfvLIG | DNA-GA                     | 2.83±0.28                                                       |
| WT AsfvLIG | DNA-TT                     | 2.49±0.13                                                       |
| WT AsfvLIG | DNA-AA                     | 1.96±0.18                                                       |
| WT AsfvLIG | DNA-AG                     | 1.44±0.14                                                       |

<sup>a</sup>: The detailed sequences and structures of DNAs are listed in Table S1.

<sup>b</sup>: Values are means  $\pm$  s.d. from three independent experiments.

**Supplementary Table 3.** The DNA ligation rates of the WT and mutant *AsfV*LIG<sup>a</sup>.

|        | WT<br>( $\times 10^{-6}$ , min <sup>-1</sup> ) | L402R<br>( $\times 10^{-6}$ , min <sup>-1</sup> ) | Q403F<br>( $\times 10^{-6}$ , min <sup>-1</sup> ) | Double<br>( $\times 10^{-6}$ , min <sup>-1</sup> ) | Triple<br>( $\times 10^{-6}$ , min <sup>-1</sup> ) | Quadruple<br>( $\times 10^{-6}$ , min <sup>-1</sup> ) |
|--------|------------------------------------------------|---------------------------------------------------|---------------------------------------------------|----------------------------------------------------|----------------------------------------------------|-------------------------------------------------------|
| DNA-TA | 224.82±8.26                                    | 4.41±0.17                                         | 2.77±0.13                                         | 0.49±0.01                                          | 0.65±0.03                                          | 0.55±0.03                                             |
| DNA-GC | 145.42±3.99                                    | 0.96±0.10                                         | 0.92±0.04                                         | 0.79±0.03                                          | 0.67±0.03                                          | 0.52±0.03                                             |
| DNA-CG | 134.83±3.32                                    | 1.43±0.15                                         | 0.60±0.04                                         | 0.65±0.02                                          | 0.41±0.02                                          | 0.50±0.02                                             |
| DNA-AT | 127.94±5.33                                    | 3.05±0.16                                         | 2.68±0.07                                         | 0.49±0.02                                          | 1.45±0.04                                          | 1.08±0.04                                             |
| DNA-CT | 195.11±11.20                                   | 10.06±0.36                                        | 0.31±0.02                                         | 0.57±0.04                                          | 0.74±0.05                                          | 0.22±0.01                                             |
| DNA-TC | 189.94±7.20                                    | 8.03±0.26                                         | 0.25±0.03                                         | 0.61±0.03                                          | 0.77±0.04                                          | 0.22±0.02                                             |

<sup>a</sup>: Values are means  $\pm$  s.d. from three independent experiments.

**Supplementary Table 4.** The DNA ligation rates of the WT and mutant *HsLIG1*<sup>a</sup>.

|        | <i>HsLIG1</i><br>( $\times 10^{-6}$ , min <sup>-1</sup> ) | <i>HsLIG1-d</i><br>( $\times 10^{-6}$ , min <sup>-1</sup> ) | <i>HsLIG1-q</i><br>( $\times 10^{-6}$ , min <sup>-1</sup> ) |
|--------|-----------------------------------------------------------|-------------------------------------------------------------|-------------------------------------------------------------|
| DNA-TA | 264.30 $\pm$ 12.10                                        | 0.35 $\pm$ 0.02                                             | n.d.                                                        |
| DNA-AT | 236.70 $\pm$ 8.43                                         | 0.37 $\pm$ 0.01                                             | n.d.                                                        |
| DNA-GC | 207.30 $\pm$ 7.30                                         | 0.31 $\pm$ 0.02                                             | n.d.                                                        |
| DNA-CG | 172.70 $\pm$ 5.92                                         | 0.71 $\pm$ 0.02                                             | n.d.                                                        |
| DNA-CT | 37.11 $\pm$ 1.32                                          | n.d.                                                        | n.d.                                                        |
| DNA-TC | 39.81 $\pm$ 1.24                                          | n.d.                                                        | n.d.                                                        |
| DNA-TG | 81.00 $\pm$ 3.57                                          | n.d.                                                        | n.d.                                                        |
| DNA-GT | 29.48 $\pm$ 0.90                                          | n.d.                                                        | n.d.                                                        |
| DNA-CA | 14.91 $\pm$ 0.63                                          | n.d.                                                        | n.d.                                                        |
| DNA-AC | 2.78 $\pm$ 0.16                                           | n.d.                                                        | n.d.                                                        |
| DNA-GA | 0.17 $\pm$ 0.01                                           | n.d.                                                        | n.d.                                                        |
| DNA-AG | 1.60 $\pm$ 0.07                                           | n.d.                                                        | n.d.                                                        |
| DNA-CT | 2.44 $\pm$ 0.12                                           | n.d.                                                        | n.d.                                                        |
| DNA-TC | 12.62 $\pm$ 0.31                                          | n.d.                                                        | n.d.                                                        |
| DNA-TG | 7.76 $\pm$ 0.30                                           | n.d.                                                        | n.d.                                                        |
| DNA-GT | 0.95 $\pm$ 0.04                                           | n.d.                                                        | n.d.                                                        |

<sup>a</sup>: Values are means  $\pm$  s.d. from three independent experiments.

**Supplementary Table 5.** Sequences of the optimized cDNA of wild type *AsfvLIG* and the primers for *AsfvLIG* mutant constructions

| <b>The optimized cDNA sequence of wild type <i>AsfvLIG</i><sup>a</sup> (from 5' to 3')</b>                                                                                                                                                                                                                                                                                                                                                                                                                                                                                                                                                                                                                                                                                                                                                                                                                                                                                                                                                                                                                                                                                                                                                                                                                                      |                                                |
|---------------------------------------------------------------------------------------------------------------------------------------------------------------------------------------------------------------------------------------------------------------------------------------------------------------------------------------------------------------------------------------------------------------------------------------------------------------------------------------------------------------------------------------------------------------------------------------------------------------------------------------------------------------------------------------------------------------------------------------------------------------------------------------------------------------------------------------------------------------------------------------------------------------------------------------------------------------------------------------------------------------------------------------------------------------------------------------------------------------------------------------------------------------------------------------------------------------------------------------------------------------------------------------------------------------------------------|------------------------------------------------|
| <p><u>GGATCC</u>ATGCTCAACCAGTTCCTCCAGGCCAGTATTCTAATAACATTTTCTGCTTCCCGCCAATCGAATCTGAAACGAAATCTGGTAAGAAGGCTTCTTGGATTATCTGCGTTTCAGGTTGTTTCAGCATAACACCATTATTCGAATCACCGACGAGATGTTCTCTACCGACGTTAAGGACGCGGTTGCGGAAATCTTTACCAAATCTTCTGTTGAGGAAGGCGCGGTGCGTATCTCTAAATGACCCGTGTACCGAAGGCAAGAACCTCGGCAAAAAGAACGCCACTACCGTTGTACACCAGGCGTTCAAAGACGCCCTGTCTAAGTATAATCGCCATGCGCGTCAGAAACGTGGTGCGCATACCAACCGTGGTATGATCCCGCCGATGCTGTAAATACTTCAATATCATCCCGAAGACGTTTTTCGAAGAAGAAACCGATCCGATTGTGCAGCGTAAACGCAATGGCGTGCAGTTGCGTGCCAGCAGGGTGACGGTTGCATCCTCCTGACTCTCGTACCGAGAAAGAGTTCTGGGTCTCGACAACATCAAGAAAGAACTCAAGCAGCTCTATCTGTTTCATCGACGTTTCGTGTTTATCTGGACGGCGAACTGTACCTGCACCGTAAACCGCTGCAATGGATCGCGGGTCAGGCGAACGCTAAAACGGATTCTTCTGAACTCCACTTCTACGTTTTCGACTGCTTCTGGTCTGACCAGCTGCAGATGCCGAGCAACAAACGTCAACAGCTGCTGACCAACATCTTCAAGCAAAAGGAGGACCTCACGTTCCATCCACCAAGTTGAAAACCTTCTCTGTTAAGAATGTAGACGAAGCGCTGCGTCTGAAAGCGCAATTCATTAAGAAGGTTACGAGGGTGCATCGTTCGTAACCGCAATGGTCCGTACGAACCGGGTTACAACAACCTACTCTGCGCATCTGGCAAAGCTCAAACCACTGCTCGACGCAGAATTCATCCTCGTGGACTATACCCAGGGTAAAAAAGTAAGGACCTGGGTGCAATTCTGTGGGTATGTGAACTGCCGAACAAAAGCGTTTTGTTGTTACCCCGAAACATCTGACCTACGCGGATCGTTACGCGCTGTTTCAAAAACCTCACCCCTGCACTCTTTAAGAAGCACCTGTATGGCAAGGAACTGACCGTTGAATACGCTGAGCTGTCTCCGAAAACCTGGTATCCCTCTGCAGGCGCGTGCAGTTGGCTCCGTGAACCGATTAAATGTCCTGGAATCATCTAACTCGAG</p> |                                                |
| <b>Primers used for <i>AsfvLIG</i> mutant constructions<sup>b</sup></b>                                                                                                                                                                                                                                                                                                                                                                                                                                                                                                                                                                                                                                                                                                                                                                                                                                                                                                                                                                                                                                                                                                                                                                                                                                                         |                                                |
| Name                                                                                                                                                                                                                                                                                                                                                                                                                                                                                                                                                                                                                                                                                                                                                                                                                                                                                                                                                                                                                                                                                                                                                                                                                                                                                                                            | Sequence (from 5' to 3')                       |
| LIG_F                                                                                                                                                                                                                                                                                                                                                                                                                                                                                                                                                                                                                                                                                                                                                                                                                                                                                                                                                                                                                                                                                                                                                                                                                                                                                                                           | AAAGGATCCATGCTCAACCAGTTCCTCC                   |
| LIG_R                                                                                                                                                                                                                                                                                                                                                                                                                                                                                                                                                                                                                                                                                                                                                                                                                                                                                                                                                                                                                                                                                                                                                                                                                                                                                                                           | AAACTCGAGTTAGATGATTCCAGGACATTAATCGGTT          |
| LIG_121F                                                                                                                                                                                                                                                                                                                                                                                                                                                                                                                                                                                                                                                                                                                                                                                                                                                                                                                                                                                                                                                                                                                                                                                                                                                                                                                        | AAAGGATCCGGTGGTGGTGGTATGATCCC                  |
| LIG_120R                                                                                                                                                                                                                                                                                                                                                                                                                                                                                                                                                                                                                                                                                                                                                                                                                                                                                                                                                                                                                                                                                                                                                                                                                                                                                                                        | AAACTCGAGTTAGTTGGTATGCGCACCACGTTTCTGACG        |
| LIG_LD_F                                                                                                                                                                                                                                                                                                                                                                                                                                                                                                                                                                                                                                                                                                                                                                                                                                                                                                                                                                                                                                                                                                                                                                                                                                                                                                                        | TGACCCGTGTACCGAAGGCGGTGGTACTACCGTTGTACACCAGGC  |
| LIG_LD_R                                                                                                                                                                                                                                                                                                                                                                                                                                                                                                                                                                                                                                                                                                                                                                                                                                                                                                                                                                                                                                                                                                                                                                                                                                                                                                                        | GCCTGGTGTACAACGGTAGTACCACCGCCTTCGGTAACACGGGTCA |
| L402R_F                                                                                                                                                                                                                                                                                                                                                                                                                                                                                                                                                                                                                                                                                                                                                                                                                                                                                                                                                                                                                                                                                                                                                                                                                                                                                                                         | GCTGAACGACGTTGACATGCTGATTATCGTACC              |
| L402R_R                                                                                                                                                                                                                                                                                                                                                                                                                                                                                                                                                                                                                                                                                                                                                                                                                                                                                                                                                                                                                                                                                                                                                                                                                                                                                                                         | GGTACGATAATCAGCATGTCAACGTCGTTTCAGC             |
| Q403F_F                                                                                                                                                                                                                                                                                                                                                                                                                                                                                                                                                                                                                                                                                                                                                                                                                                                                                                                                                                                                                                                                                                                                                                                                                                                                                                                         | GTACGCGATCTTCTTTTTCACCGGTCCGG                  |
| Q403F_R                                                                                                                                                                                                                                                                                                                                                                                                                                                                                                                                                                                                                                                                                                                                                                                                                                                                                                                                                                                                                                                                                                                                                                                                                                                                                                                         | CCGGACCGGTGAAAAGAAGATCGCGTAC                   |
| N153D_F                                                                                                                                                                                                                                                                                                                                                                                                                                                                                                                                                                                                                                                                                                                                                                                                                                                                                                                                                                                                                                                                                                                                                                                                                                                                                                                         | CCGTACGCGATCTTCGACTTCACCGGTCCGGT               |
| N153D_R                                                                                                                                                                                                                                                                                                                                                                                                                                                                                                                                                                                                                                                                                                                                                                                                                                                                                                                                                                                                                                                                                                                                                                                                                                                                                                                         | CACCGGACCGGTGAAGTCAAGATCGCGTACGG               |
| L211F_F                                                                                                                                                                                                                                                                                                                                                                                                                                                                                                                                                                                                                                                                                                                                                                                                                                                                                                                                                                                                                                                                                                                                                                                                                                                                                                                         | CTGCACCGTAAACCGTTCCAATGGATCGCGGGT              |
| L211F_R                                                                                                                                                                                                                                                                                                                                                                                                                                                                                                                                                                                                                                                                                                                                                                                                                                                                                                                                                                                                                                                                                                                                                                                                                                                                                                                         | ACCCGCGATCCATTGGAACGGTTTACGGTGCAG              |
| LIG_318R                                                                                                                                                                                                                                                                                                                                                                                                                                                                                                                                                                                                                                                                                                                                                                                                                                                                                                                                                                                                                                                                                                                                                                                                                                                                                                                        | AAACTCGAGTTATTTGAGCTTTGCCAGATGCGCAG            |

<sup>a</sup>: GGATCC and CTCGAG at the 5'-end and 3'-end are BamHI and XhoI recognition sequence.

<sup>b</sup>: LIG\_F and LIG\_120R, LIG\_121F and LIG\_R, LIG\_LD\_F and LIG\_LD\_R, LIG\_F and LIG\_318R, and Q403F\_F and Q403F\_R were used for the constructions of *AsfvLIG* NTD, *AsfvLIG* ΔN, *AsfvLIG* LD, *AsfvLIG* ΔOB, and Q403F, respectively. Whereas, L402R\_F and L402R\_R were utilized in the construction of all other mutants.



**Supplementary Table 6.** Sequences of the primers for WT or mutant *HsLIG1* constructions

| <b>Primers used for <i>HsLIG1</i> mutant constructions <sup>a</sup></b> |                                           |
|-------------------------------------------------------------------------|-------------------------------------------|
| Name                                                                    | Sequence (from 5' to 3')                  |
| <i>HsLIG1_F</i>                                                         | AAAGGATCCGGTGGTGGTATCCATCTGGTTACAATCCTGCC |
| <i>HsLIG1_R</i>                                                         | AAACTCGAGTTAGTAGGTATCTTCAGGGTCAGAGCC      |
| <i>HsLIG1_D570N_F</i>                                                   | TGCGAATACAAATATAATGGGCAGAGGGCACAG         |
| <i>HsLIG1_D570N_R</i>                                                   | CTGTGCCCTCTGCCCATATATTTGTATTGCA           |
| <i>HsLIG1_F635L_F</i>                                                   | AAGCAGATCCAGCCATTGCAAGTGCTCACCACC         |
| <i>HsLIG1_F635L_R</i>                                                   | GGTGGTGAGCACTTGCAATGGCTGGATCTGCTT         |
| <i>HsLIG1_R871L/F872Q_F</i>                                             | AAGGGCATCTCCCTTTTGC AACCTCGGTTTATTGCA     |
| <i>HsLIG1_R871L/F872Q_R</i>                                             | TCGAATAAACCGAGGTTGCAAAAGGGAGATGCCCTT      |

<sup>a</sup>: *HsLIG1\_F* and *HsLIG1\_R* were used for the construction of WT *HsLIG1*. *HsLIG1\_R871L/F872Q\_F* and *HsLIG1\_R871L/F872Q\_R* were used for the constructions of R871L/F872Q double mutant. All other primers were used for the construction of D570N/F635L/R871L/F872Q quadruple mutant.

**Supplementary Table 7.** Structures and crystallization conditions

| <b>DNAs utilized in crystallization</b> |                                                                                                            |                                                                                                 |
|-----------------------------------------|------------------------------------------------------------------------------------------------------------|-------------------------------------------------------------------------------------------------|
| DNA Name                                | Sequence and secondary structure                                                                           |                                                                                                 |
| DNA1                                    | <pre> 5' -CCAGTCCGACCCGCATCCCGGA-3'           3' -GGTCAGGCTGTGCGTAGGGCCT-5'                       P </pre> |                                                                                                 |
| DNA2                                    | <pre> 5' -CCAGTCCGACCCGCATCCCGGA-3'           3' -GGTCAGGCTGGCGTAGGGCCT-5'                       P </pre>  |                                                                                                 |
| <b>Structure and crystallization</b>    |                                                                                                            |                                                                                                 |
| Structure Name                          | Sample composition                                                                                         | Well solution                                                                                   |
| Se-Asf <sub>v</sub> LIG:DNA             | Se-Asf <sub>v</sub> LIG (0.15 mM)<br>DNA1 (0.22 mM)<br>ATP (1 mM)                                          | 0.1 M BIS-TRIS pH 5.5<br>15% w/v PEG 10,000<br>0.1 M Ammonium acetate<br>0.1 M Cadmium chloride |
| Asf <sub>v</sub> LIG:CT1                | Asf <sub>v</sub> LIG (0.18 mM)<br>DNA1 (0.2 mM)                                                            | 0.1 M BIS-TRIS pH 5.5<br>15% w/v PEG 10,000<br>0.1 M Ammonium acetate                           |
| Asf <sub>v</sub> LIG:CT2                | Asf <sub>v</sub> LIG (0.15 mM)<br>DNA1 (0.2 mM)<br>ATP (1 mM)<br>MgCl <sub>2</sub> (2 mM)                  | 0.1 M BIS-TRIS pH 5.5<br>15% w/v PEG 10,000<br>0.1 M Ammonium acetate                           |
| Asf <sub>v</sub> LIG:CG                 | Asf <sub>v</sub> LIG (0.15 mM)<br>DNA2 (0.18 mM)                                                           | 0.1 M BIS-TRIS pH 5.5<br>10% w/v PEG 10,000<br>0.1 M Ammonium acetate                           |

**Supplementary Table 8.** Data collection and refinement statistics

| Structure<br>(PDB ID)                         | AsfVLIG:CT1<br>6IML | AsfVLIG:CT2<br>6IMN                           | AsfVLIG:CG<br>6IMK | Se-AsfVLIG:DNA<br>6IMJ |
|-----------------------------------------------|---------------------|-----------------------------------------------|--------------------|------------------------|
| <b>Data collection<sup>a</sup></b>            |                     |                                               |                    |                        |
| Space group                                   | P2 <sub>1</sub>     | P2 <sub>1</sub> 2 <sub>1</sub> 2 <sub>1</sub> | P2 <sub>1</sub>    | P2 <sub>1</sub>        |
| Cell parameter:                               |                     |                                               |                    |                        |
| a (Å)                                         | 77.2                | 58.2                                          | 72.3               | 94.8                   |
| b (Å)                                         | 53.7                | 114.0                                         | 55.2               | 63.1                   |
| c (Å)                                         | 76.2                | 243.1                                         | 79.9               | 119.3                  |
| α (°)                                         | 90.0                | 90.0                                          | 90.0               | 90.0                   |
| β (°)                                         | 100.5               | 90                                            | 103.1              | 89.9                   |
| γ (°)                                         | 90.0                | 90.0                                          | 90.0               | 90.0                   |
| Wavelength (Å)                                | 1.0000              | 1.0000                                        | 1.0000             | 0.9793                 |
| Resolution (Å)                                | 30.0-2.35           | 30.0-2.70                                     | 30.0-2.50          | 30.0-2.55              |
| Last shell (Å)                                | 2.43-2.35           | 2.80-2.70                                     | 2.59-2.50          | 2.64-2.55              |
| Completeness (%)                              | 95.5(83.7)          | 96.7(85.1)                                    | 98.5(96.9)         | 97.7(95.0)             |
| Redundancy                                    | 3.9(2.5)            | 6.8(2.7)                                      | 5.5(4.3)           | 4.7(3.2)               |
| I/σ(I)                                        | 15.9(1.77)          | 10.9(2)                                       | 17.3(2.7)          | 13.2(1.9)              |
| Rmerge (%)                                    | 13.3(50.1)          | 11.1(39.4)                                    | 9.1(48.2)          | 11.4(46.7)             |
| <b>Refinement</b>                             |                     |                                               |                    |                        |
| Resolution (Å)                                | 29.9-2.35           | 29.9-2.70                                     | 29.7-2.5           | 29.9-2.55              |
| R <sub>work</sub> (%) / R <sub>free</sub> (%) | 21.9/26.8           | 24.7/26.8                                     | 20.5/25.4          | 22.3/26.1              |
| No. of atoms                                  |                     |                                               |                    |                        |
| Protein                                       | 3140                | 6438                                          | 3268               | 6288                   |
| DNA                                           | 895                 | 1787                                          | 897                | 818                    |
| water                                         | 67                  | 9                                             | 100                | 78                     |
| Wilson B factors (Å <sup>2</sup> )            | 38.6                | 40.7                                          | 45.1               | 42.1                   |
| Average B factors (Å <sup>2</sup> )           |                     |                                               |                    |                        |
| Protein                                       | 44.6                | 43.2                                          | 49.3               | 53.5                   |
| DNA                                           | 43.7                | 40.4                                          | 52.6               | 79.8                   |
| Water                                         | 37.9                | 39.6                                          | 44.4               | 49.7                   |
| ATP                                           |                     |                                               |                    | 76.2                   |
| R.m.s. deviations                             |                     |                                               |                    |                        |
| Bond length (Å)                               | 0.003               | 0.004                                         | 0.003              | 0.005                  |
| Bond angle (°)                                | 0.490               | 0.679                                         | 0.498              | 0.765                  |
| Ramachandran plot (%)                         |                     |                                               |                    |                        |
| Most favored                                  | 97.5                | 95.9                                          | 97.5               | 96.5                   |
| Additional allowed                            | 2.5                 | 4.1                                           | 2.5                | 3.5                    |
